# Supplementary material for: Evaluation of Tumor Cell Proliferation by Ki-67 Expression and Mitotic Count in Lymph Node Metastases from Breast Cancer
Source: PLoS One. 2016 Mar 8;11(3):e0150979. doi: 10.1371/journal.pone.0150979 (PMC4783103; doi:10.1371/journal.pone.0150979)
Supplement: S3 Table — (XLSX) [file pone.0150979.s010.xlsx]

## Sheet: Ark1
Case_nr	Status	Metastsis	PT diam/2gr	ER	PR	HER2	Grad	Molecular type	LN no.	Ki-67 PT	Ki-67 LN	MC LN	MC PT	2grKi-67LN	2grKi-67PT	2grMC LN	2grMC PT	StGallenKi-PT	StGallenKI-LN
	1	0	1	0	1	1	3	3	2	11.4	13.4	7.16	9.68	1	1	2	2	1	1
	3	1	2	0	0	1	3	4	1	38.4	47.8	11.79	18.1	2	2	2	2	2	2
	4	0	2	1	1	0	2	1	1	9.59			4.6					1
	3	1	2	1	1	0	3	2	2	47.4	64	8.8	16.84	2	2	2	2	2	2
	1	0	2	1	1	0	2	1	2	3.4	3.2	1.6	1.68	1	1	1	1	1	1
	1	0	2	1	1	0	2	1	1	5.2	4.19	0.4	2.1	1	1	1	1	1	1
	3	1	2	1	0	0	3	2	1	25.8			9.26					2
	1	0	1	1	0	0	3	2	1	24.4	44.2	16.84	13.05	2	2	2	2	2	2
	1	0	2	1	1	0	2	1	1	3.4			3.37					1
	1	0	1	1	0	0	3	2	1	14			7.1					1
	1	0	1	1	0	0	1	2	1	9.6	4.6	0.84	6.31	1	1	1	2	1	1
	1	0	1	1	0	0	1	2	1	6.6	4.6	3.6	2.1	1	1	1	1	1	1
	1	0	1	1	1	0	2	1	1	5.2	14.8	5.05	4.21	2	1	1	1	1	1
	1	0	1	1	0	0	1	2	1	15			1.26					1
	3	1	1	1	0	0	1	2	1	0.8			1.26					1
	1	0	2	1	1	0	2	1	1	3.4	3.4	0.42	1.26	1	1	1	1	1	1
	1	0	2	1	0	0	2	2	1	8.8	5.4	2.1	5.05	1	1	1	2	1	1
	1	0	1	1	1	0	1	1	1	0.8	14.6	1.26	2.9	1	1	1	1	1	1
	3	1	1	1	0	0	1	2	1	5.2	5.2	0.42	1.68	1	1	1	1	1	1
	1	0	1	1	1	0	2	1	1	10.8		0.42	1.68					1
	1	0	2	1	0	0	2	2	1	5.2			4.21					1
	3	1	2	1	0	0	2	2	2	19.2	22	1.68	5.89	2	2	1	2	1	2
	3	1	1	1	1	0	2	1	2	14.8	22.2	5.89	2.95	2	2	2	1	1	2
	1	0	1	1	1	0	1	1	1	4	7.2	0.84	0.84	1	1	1	1	1	1
	1	0	1	1	1	0	1	1	1	0.8			0.84					1
	1	0	1	1	1	0	2	1	1	11.8	11.2	4.63	1.26	1	1	1	1	1	1
	4	0	2	1	0	0	1	2	2	7.2	3.8	0.42	3.37	1	1	1	1	1	1
	1	0	2	1	1	0	1	1	1	2.8	8	0.84	2.95	1	1	1	1	1	1
	1	0	2	1	1	0	2	1	1	14.4	11.5	2.1	3.37	1	2	1	1	1	1
	1	0	1	1	1	0	2	2	2	44.6	43	9.26	8	2	2	2	2	2	2
	1	0	1	1	1	0	2	1	1	10.6			2.1					1
	2	1	1	1	0	0	2	2	2	16.2	26.6	9.25	1.26	2	2	2	1	1	2
	1	0	2	1	1	0	2	2	1
	1	0	1	1	0	0	2	2	1	1.19	6.6	0.84	4.21	1	1	1	1	1	1
	2	1	2	1	0	1	3	3	1	5.1								1
	1	0	1	1	0	0	2	2	2	6.8	12.4	1.26	0.84	1	1	1	1	1	1
	1	0	2	1	1	0	2	1	2	14.2	20	2.53	4.63	2	1	1	2	1	1
	1	0	1	1	1	0	3	1	1	11.2	34.2	11.36	7.16	2	1	2	2	1	2
	1	0	2	1	0	0	2	2	1	9								1
	3	1	1	1	0	0	2	2	2	1.19	26.8	5.47	0.42	2	1	1	1	1	2
	1	0	1	1	1	0	1	1	1	3.6			0.84					1
	3	1	1	0	0	1	3	4	2	23.4	34.8	2.1	1.68	2	2	1	1	2	2
	3	1	2	1	1	0	2	1	1				0.42
	3	1	2	1	0	0	3	2	1	30	53.4	11.79	5.89	2	2	2	2	2	2
	1	0	1	1	0	0	3	2	1	6.8			3.79					1
	3	1	1	0	0	0	3	1	1	40.4			11.79					2
	2	1	2	0	0	1	3	4	1	19.2	16.4	2.94	9.26	2	2	1	2	1	1
	3	1	2	0	0	0	3	5	1	9.8	21	21.4	4.6	2	1	2	2	1	2
	1	0	1	1	1	0	1	2	1	28.6	2.2	0.42	1.68	1	2	1	1	2	1
	1	0	2	0	0	0	3	5	1	52	42.4	4.21	18.1	2	2	1	2	2	2
	1	0	2	1	0	0	2	2	1				6.73
	1	0	1	1	1	0	1	1	1	5	2.39	1.26	3.37	1	1	1	1	1	1
	1	0	1	1	1	0	2	1	1	16.2	14.6	3.7	0.84	1	2	1	1	1	1
	1	0	1	1	0	0	2	2	1	15.4	20	2.31	7.58	2	2	1	2	1	1
	1	0	2	1	1	0	3	2	1	39	38.8	5.05	5.47	2	2	1	2	2	2
	1	0	1	1	1	0	2	1	1	5.2	26.4	1.26	1.26	2	1	1	1	1	2
	1	0	1	1	1	0	1	1	1	4.6	3.4	1.39	1.68	1	1	1	1	1	1
	1	0	1	1	1	0	2	1	1	12.8			3.7					1
	1	0	2	0	0	0	3	5	1	22.4			8.84					2
	1	0	1	1	1	0	1	1	1	5.6			2.95					1
	1	0	1	1	1	0	2	1	1	2.8	5.2	1.68	1.68	1	1	1	1	1	1
	1	0	1	0	0	1	2	4	1	9.59			1.26					1
	1	0	1	1	0	0	2	2	1	3.4	6.2	1.26	0.84	1	1	1	1	1	1
	1	0	1	1	1	0	1	2	1	9	17.6	1.68	3.37	2	1	1	1	1	1
	1	0	2	1	1	0	2	1	1	3.6			2.1					1
	1	0	1	1	1	0	2	2	1	15.6			5.47					1
	1	0	2	1	1	0	2	1	2	14.8	13.8	4.21	1.26	1	2	1	1	1	1
	1	0	1	0	0	0	2	5	1	8	21.4	3.79	7.16	2	1	1	2	1	2
	3	1	2	1	1	0	2	2	2	15	14	2.53	2.95	1	2	1	1	1	1
	1	0	1	1	1	0	1	1	1	5.4	6.8	7.5	5	1	1	2	2	1	1
	1	0	2	1	1	0	2	1	1	14.4	10.6	1.26	2.1	1	2	1	1	1	1
	1	0	1	1	1	1	2	3	1	7.3	15.2	11.36	4.63	2	1	2	2	1	1
	1	0	1	1	1	0	2	1	1	3.4			4.63					1
	1	0	1	1	1	0	2	1	1				2.53
	1	0	2	1	1	0	2	1	1	7.6			6.73					1
	2	1	1	1	1	0	2	1	1	19.4			3.37					1
	1	0	1	1	1	0	2	1	2	11.8	29.4	13.05	0.42	2	1	2	1	1	2
	2	1	1	1	0	0	2	2	2	11	30.2	4.21	2.53	2	1	1	1	1	2
	1	0	1	1	1	0	3	1	1	19.4	13.8	2.1	3.79	1	2	1	1	1	1
	1	0	2	1	1	0	2	1	2	5.8			1.26					1
	1	0	1	1	1	0	1	1	2	8.59	8.59	3.37	6.73	1	1	1	2	1	1
	1	0	1	1	1	0	2	1	1	2.8			0.42					1
	1	0	1	1	0	0	3	2	1	11	35	6.31	13.05	2	1	2	2	1	2
	3	1	2	1	1	0	2	1	2	5.2	23.8	16.84	2.95	2	1	2	1	1	2
	1	0	2	1	1	0	3	1	1	10	28.2	8	3.37	2	1	2	1	1	2
	3	1	2	1	1	1	3	3	1	33			1.26					2
	1	0	1	0	0	1	3	4	1	21.8			3.37					2
	1	0	2	1	1	0	2	3	1	5.6	13	0.42	0.42	1	1	1	1	1	1
	3	1	1	1	1	1	2	3	2	9.2	21.8	6.73	0.84	2	1	2	1	1	2
	3	1	2	1	1	0	2	1	2				0.42
	1	0	2	1	1	0	2	1	1	11.6			1.26					1
	1	0	1	1	1	0	1	1	1	1.8	2	0.59	0.84	1	1	1	1	1	1
	3	1	1	1	1	1	3	3	2	19.6	16	3.79	4.63	2	2	1	2	1	1
	4	0	1	1	0	0	1	2	1	42.8	3.8	0.84	3.37	1	2	1	1	2	1
	2	1	1	1	1	0	2	2	1	39.8	29.6	13.47	6.31	2	2	2	2	2	2
	4	0	2	1	1	0	2	2	1	25			0.42					2
	1	0	1	0	1	0	2	1	1	9	5.4	0.42	0.84	1	1	1	1	1	1
	4	1	2	0	0	0	2	5	2	70.4	71.4	12.63	1.26	2	2	2	1	2	2
	4	0	2	1	0	0	2	2	1	5			0.42					1
	3	1	2	1	0	0	2	2	1	14.2	5.8	0.84	1.26	1	1	1	1	1	1
	1	0	2	0	0	1	2	4	2	19.4	47.8	5.05	0.42	2	2	1	1	1	2
	2	1	2	0	1	0	3	1	1	18.4			1.26					1
	1	0	2	0	1	0	3	1	1	18.4	10.8	1.68	0.84	1	2	1	1	1	1
	1	0	2	0	0	0	3	5	2	70.8	69.8	8.84	5.47	2	2	2	2	2	2
	2	1	1	0	0	0	3	5	1	17	29.4	5.41	1.05	2	2	1	1	1	2
	2	1	1	1	0	0	1	2	1	20.6	11.4	2.95	0.42	1	2	1	1	2	1
	1	0	2	1	0	0	1	2	1	2.39			0.84					1
	2	1	1	0	1	0	1	1	1	10.4	8	1.26	2.53	1	1	1	1	1	1
	2	1	2	1	0	0	2	2	1	31.2	22.8	4.21	13.47	2	2	1	2	2	2
	1	0	1	1	1	0	1	1	1	8.59	3.6	0.42	1.26	1	1	1	1	1	1
	1	0	2	0	0	1	1	4	2	20.2	27.2	5.89	2.1	2	2	2	1	2	2
	2	1	2	1	1	0	2	1	2	7	5	0.84	0.84	1	1	1	1	1	1
	1	0	2	1	1	0	2	1	1	30.2	19	3.37	0.42	2	2	1	1	2	1
	1	0	1	1	0	0	2	2	1	0.4	19.4	0.84	0.42	2	1	1	1	1	1
	1	0	1	1	0	0	1	2	1	12.4	21.4	3.79	3.37	2	1	1	1	1	2
	2	1	2	1	1	0	2	2	2	24.6	6.6	0.84	3.37	1	2	1	1	2	1
	1	0	1	1	1	0	2	2	1	20	24.8	5.89	1.68	2	2	2	1	1	2
	1	0	1	1	1	0	1	1	1	2.2	4.4	0.42	0.42	1	1	1	1	1	1
	2	1	1	1	1	0	3	2	1	58	39.6	8	11.36	2	2	2	2	2	2
	2	1	1	0	0	1	2	4	1	32.8	42.4	4.21	5.05	2	2	1	2	2	2
	4	0	1	1	1	0	1	2	2	32	22.4	8.42	0.42	2	2	2	1	2	2
	2	1	2	0	0	0	2	5	1	45.4			5.05					2
	2	1	2	1	1	0	2	2	1	22.4	17.8	3.79	1.68	2	2	1	1	2	1
	2	1	2	1	1	0	3	2	2	36.4	26.2	7.58	8.42	2	2	2	2	2	2
	1	0	2	1	1	0	2	1	2	10.2	18.2	0.84	1.68	2	1	1	1	1	1
	2	1	2	1	0	0	2	2	1	46			2.53					2
	4	0	1	1	1	0	1	1	1	5.8	6.4	0.84	0.84	1	1	1	1	1	1
	2	1	2	1	1	0	2	2	2	23.2	7.8	0.84	1.26	1	2	1	1	2	1
	4	0	1	1	0	0	1	2	1	10			0.84					1
	4	0	1	1	1	0	2	1	1	3.2			0.42					1
	2	1	1	1	1	0	1	2	1	25.2	8	0.42	2.1	1	2	1	1	2	1
	4	0	1	1	1	0	1	1	1	13.2	12.2	5.47	2.95	1	1	1	1	1	1
	4	0	1	1	1	0	1	2	1	20	8.59	1.26	2.1	1	2	1	1	1	1
	1	0	2	1	1	0	2	2	1	22.4			1.26					2
	1	0	2	1	1	0	1	1	1	2.8	0.2	0.7	0.42	1	1	1	1	1	1
	2	1	2	1	0	1	3	3	1	55.4	44.6	9.68	2.53	2	2	2	1	2	2
	1	0	2	1	1	0	1	1	1	9.2	8.39	0.84	0.42	1	1	1	1	1	1
	1	0	2	1	0	0	1	2	2	21.4	26.6	4.21	2.1	2	2	1	1	2	2
	2	1	2	1	1	0	3	2	1	31.2	10.4	0.84	3.79	1	2	1	1	2	1
	2	1	2	1	1	0	3	2	1	29.4	30.4	10.94	11.79	2	2	2	2	2	2
	2	1	2	1	1	0	1	1	2	18.8	37.2	8.84	0.84	2	2	2	1	1	2
	4	0	2	1	1	0	1	2		25.8	3.8	1.26	7.16	1	2	1	2	2	1
	2	0	2	1	0	0	2	2	2	7.8	13.6	1.26	1.2	1	1	1	1	1	1
	2	1	2	1	1	0	2	1	2	1.4	14	0.84	0.42	1	1	1	1	1	1
	1	0	2	1	1	0	1	2	2	15.8	26.8	5.05	2.95	2	2	1	1	1	2
	4	0	1	0	1	0	1	2	1	13	5	0.42	2.1	1	1	1	1	1	1
	2	1	2	0	0	0	3	5	2	63.3	50	11.79	6.73	2	2	2	2	2	2
	3	1	2	1	1	0	2	2	1	21.8	7.6	1.68	1.26	1	2	1	1	2	1
	2	1	2	0	0	0	3	5	1	50.8	38	13.05	9.26	2	2	2	2	2	2
	2	1	2	1	1	1	2	3	2	14.6	20.8	2.53	1.26	2	2	1	1	1	2
	3	1	1	1	1	0	2	2	2	12	15.8	0.84	0.84	2	1	1	1	1	1
	3	1	2	1	1	1	2	3	1	35.8	36.6	12.63	0.42	2	2	2	1	2	2
	1	0	2	1	1	0	2	2	2	34.8	31	16.84	4.21	2	2	2	1	2	2
	1	0	2	1	1	0	2	1	2	5.4	7.39	0.42	0.42	1	1	1	1	1	1
	2	1	2	1	1	0	2	2	2	19.4	23	2.53	0.84	2	2	1	1	1	2
	1	0	2	1	1	0	2	2	1	30	16.8	1.68	2.1	2	2	1	1	2	1
	1	0	1	1	1	0	1	1	1	3.6	2.8	0.42	0.42	1	1	1	1	1	1
	1	0	1	1	0	0	2	2	2	12.8	16.6	0.42	0.42	2	1	1	1	1	1
	1	0	1	1	1	0	1	1	1	17.2	2.2	0.84	3.37	1	2	1	1	1	1
	1	0	2	1	1	0	2	2	1	37	10	0.84	0.42	1	2	1	1	2	1
	2	0	2	1	1	0	1	1	2	14.8	3.4	1.26	0.42	1	2	1	1	1	1
	1	0	1	1	1	0	2	1	1	16.6			0.42					1
	4	0	1	1	1	0	1	2	1	11.2	5.2	0.53	0.42	1	1	1	1	1	1
	3	1	2	1	1	1	3	3	2	37	5.2	0.42	0.42	1	2	1	1	2	1
	1	0	2	1	1	0	3	1	2	3.8	36.8	9.68	0.42	2	1	2	1	1	2
	1	0	2	0	0	1	3	4	1	44.4			10.94					2
	2	1	1	0	0	1	1	4	1	11.8	20.4	2.95	2.1	2	1	1	1	1	2
	3	1	2	0	0	1	3	4	2	51	33.6	7.16	5.89	2	2	2	2	2	2
	1	0	2	1	1	0	2	1	1	11.8	9.59	3.37	5.47	1	1	1	2	1	1
	3	1	1	0	0	0	3	5	1	53.6			8					2
	1	0	2	1	0	1	3	3	1	31.2	20.2	0.84	3.37	2	2	1	1	2	2
	1	0	2	0	0	1	3	4	2	37.6	45.2	12.21	8.84	2	2	2	2	2	2
	1	0	2	1	1	0	2	2	1	16.8			1.26					1
	1	0	1	1	1	0	1	2	1	17.2	13	0.42	0.42	1	2	1	1	1	1
	1	0	1	1	1	0	2	1	2	9.39	6.8	1.68	3.79	1	1	1	1	1	1
	1	0	1	1	1	0	2	1	2	9.8	6	0.84	1.68	1	1	1	1	1	1
	3	1	2	1	1	0	1	1	2	2.6	12.8	2.53	0.84	1	1	1	1	1	1
	1	0	2	1	1	0	2	1	2	2.3	4.4	0.42	0.84	1	1	1	1	1	1
	1	0	1	1	1	0	2	2	1	22.6			0.42					2
	1	0	1	1	1	1	2	3	1	25.2			6.31					2
	1	0	2	1	1	0	2	1	1	5.79			1.26					1
	3	1	1	1	0	0	3	2	1	16.4	16.6	13.05	4.63	2	2	2	2	1	1
	3	1	2	1	1	0	1	1	2	2	4.79	0.42	0.42	1	1	1	1	1	1
	3	1	1	0	0	0	3	5	1	36.6			8.42					2
	1	0	1	0	0	0	3	5	1	38.8	48.6	9.68	9.26	2	2	2	2	2	2
	1	0	1	1	1	0	1	1	1	10.2			2.53					1
	3	1	1	0	0	1	2	4	1	32.6			2.95					2
	1	0	1	1	1	0	2	1	1	9.2	2.8	0.53	0.84	1	1	1	1	1	1
	1	0	1	1	0	0	2	2	1	11.8	13	0.53	1.26	1	1	1	1	1	1
	3	1	1	0	0	0	2	5	2	10.8	18	2.53	0.42	2	1	1	1	1	1
	1	0	1	1	1	0	2	2	1	60.6	22.4	7.89	0.42	2	2	2	1	2	2
	1	0	1	1	1	0	1	1	1	2	4	1.4	0.84	1	1	1	1	1	1
	1	0	1	1	1	0	2	2	1	8.59	22.6	0.6	2.53	2	1	1	1	1	2
	1	0	1	1	1	0	1	1	1	8.4			2.53					1
	1	0	1	1	1		2		1		7.6	0.42	1.26						1
	1	0	1	1	1	0	2	2	2	17.2	36	0.84	0.84	2	2	1	1	1	2
	3	1	2	0	0	1	3	4	2	26.4	33.8	11.36	7.58	2	2	2	2	2	2
	1	0	1	1	1	1	2	3	1	25.8	25.6	5.47	1.68	2	2	1	1	2	2
	3	1	2	1	0	1	3	3	1	35.8	5.2	0.42	1.68	1	2	1	1	2	1
	3	0	1	1	1	0	1	1	1	12.6			2.95					1
	3	0	1	1	1	0	1	1	2	8.59	2.2	1.26	2.53	1	1	1	1	1	1
	1	0	1	1	1	0	2	2	1	11.8	16	0.42	0.84	2	1	1	1	1	1
	3	1	1	1	0	1	2	3	1	24.6	36.8	11.36	2.53	2	2	2	1	2	2
	1	0	1	1	0	0	2	2	1	1.4			0.42					1
	3	1	1	0	0	1	3	4	1	74.4			7.16					2
	4	0	1	1	1	0	1	2	1	25	7.2	0.7	1.68	1	2	1	1	2	1
	1	0	1	1	1	0	1	2	1	12.8	26.6	7.58	0.84	2	1	2	1	1	2
	1	0	1	1	1	0	2	1	1	7.39			1.26					1
	3	1	1	1	1	0	1	2	1	24.8			5.05					2
	1	0	1	1	1	0	2	1	1	12	6.6	0.42	0.84	1	1	1	1	1	1
	3	0	1	1	1	0	3	2	1	36.6	25.4	1.26	2.95	2	2	1	1	2	2
	2	1	1	1	1	0	1	1	1	12.8			0.42					1
	1	0	1	1	1	0	1	1	1	6.2	4.19	0.7	0.84	1	1	1	1	1	1
	3	1	1	1	1	1	3	3	1	37.4	38	16.84	10.1	2	2	2	2	2	2
	1	0	1	1	1	0	2	2	1	29.6	23.8	4.63	10.94	2	2	1	2	2	2
	1	0	1	1	1	0	2	1	1	4.4	2.2	0.6	0.42	1	1	1	1	1	1
	3	1	2	0	0	1	3	4	1	15	20	1.26	0.84	2	2	1	1	1	1
	3	0	2	0	0	0	3	5	1	27.2	22.8	0.6	1.2	2	2	1	1	2	2
	1	0	1	1	1	0	1	1	1	8	6.2	0.42	0.42	1	1	1	1	1	1
	1	0	1	1	1	1	2	3	2	14.8	7.2	0.42	1.68	1	2	1	1	1	1
	3	0	1	1	1	0	1	2	1	17.8	8.2	0.47	0.84	1	2	1	1	1	1
	3	1	2	1	1	0	2	2	1	21.4	8.59	0.42	1.26	1	2	1	1	2	1
	1	0	1	1	1	0	2	1	1	3.2			1.26					1
	3	1	1	1	1	0	3	1	2	16.6	20.4	2.95	3.37	2	2	1	1	1	2
	1	0	2	1	1	0	2	2	2	15.8	19.8	2.53	1.68	2	2	1	1	1	1
	4	0	1	1	1	0	1	1	1	13.6	8.8	2.53	0.42	1	1	1	1	1	1
	4	0	1	1	1	0	2	2	1	52.2	41.2	5.05	4.63	2	2	1	2	2	2
	1	0	1	1	1	0	2	2	1	24.4			0.84					2
	3	1	1	1	1	0	2	2	2	13	7	5.47	2.53	1	1	1	1	1	1
	3	1	1	1	1	0	1	1	1	13	11	5.47	0.84	1	1	1	1	1	1
	1	0	1	1	1	0	1	1	1	9.59	9.2	0.42	2.1	1	1	1	1	1	1

## Sheet: Ark2
Variable	Definision
Status	1= alive
	2= alive with metastasis
	3=death of breast cancer
	4= Death of other causes
Metastasis	0= No metastasis
	1= With metastasis
All listed metastasis to organs	0= No metastasis
	1= With metastasis
ER, PR, HER2	0= negative
	1=positive
Molecular subtypes	1=luminal A / her2 negative
	2=luminal B/Her2 negative
	3= lum B/ her2 +
	4= Her2 positive / hormone negative
	5=triple negative
LN no.	1 =( 1-3 positive nodes)
	2 = (4 or more positive nodes)
Ki67 or MC ( 2 groups)	1= less or equal median
	2= more than median
Case_nr	Not indentified
